# Supplementary material
Source: publisher figshare collection journal article supplement (https://gsapubs.figshare.com/ndownloader/files/36444120)
Supplement: Supplementary file 1 [file 36444120]

## Sheet: Bronto xrd
			Weight % Calculated with Jade 2010 Whole Pattern Fit Reitveld Refinement
			Non-clay minerals								Clay minerals
Scan File Name	Field ID	Quartz	Albite	Calcite	Dolomite	Siderite	Pyrite	Fluorapatite	Total Non-Clay	Muscovite-2M1 (?)	Illite	Kaolinite-1A	Clinochlore	Total Clay	Total
E170608-005	BR1-6335.4	0.576	0.026	0.124	0.016	0.002	0.069	0	0.813	0.167	0.008	0.008	0.005	0.188	1.001
E170608-006	BR1-6339.3	0.478	0.022	0.058	0.008	0.001	0.036	0	0.603	0.326	0.02	0.044	0.007	0.397	1
E170608-007(_b)		0.561	0.029	0.075	0.027	0	0.024	0.004	0.72	0.231	0.016	0.026	0.007	0.28	1
E170608-007(_c)		0.562	0.03	0.075	0.027	0.001	0.024	0.004	0.723	0.23	0.017	0.023	0.007	0.277	1
E170608-007	BR1-6347.4	0.563	0.031	0.074	0.027	0.001	0.024	0.003	0.723	0.228	0.017	0.023	0.009	0.277	1
E170608-008(b)		0.25	0.006	0.674	0.017	0.007	0.003	0.013	0.97	0.03	0	0	0	0.03	1
E170608-008(_b)		0.252	0.008	0.678	0.017	0.004	0.003	0.014	0.976	0.025	0	0	0	0.025	1.001
E170608-008(_c)		0.252	0.006	0.68	0.017	0.005	0.003	0.013	0.976	0.024	0	0	0	0.024	1
E170608-008	BR1-6354.5	0.25	0.006	0.68	0.017	0.005	0.003	0.014	0.975	0.025	0	0	0	0.025	1
E170608-009(_b)		0.401	0.018	0.116	0.024	0.006	0.054	0.199	0.818	0.161	0.013	0.006	0.003	0.183	1.001
E170608-009(_c)		0.399	0.018	0.117	0.024	0.006	0.053	0.198	0.815	0.164	0.013	0.006	0.002	0.185	1
E170608-009	BR1-6356.9	0.399	0.02	0.114	0.023	0.007	0.053	0.196	0.812	0.164	0.013	0.007	0.003	0.187	0.999
E170608-010	BR1-6369.4	0.675	0.022	0.175	0.028	0.001	0.008	0.041	0.95	0.049	0	0	0	0.049	0.999
E170608-011	BR1-6410.3	0.533	0.01	0.274	0.006	0.002	0.036	0.032	0.893	0.106	0	0	0	0.106	0.999
E170608-012	BR1-6437.8	0.403	0.015	0.028	0.004	0.002	0.061	0	0.513	0.368	0.028	0.092	0	0.488	1.001

## Sheet: Surprise Ck xrd
		Weight % Calculated with Jade 2010 Whole Pattern Fit Reitveld Refinement
		Non-clay minerals										Clay minerals
Scan File Name	Field Name	Quartz	Albite	Calcite	Dolomite	Ankerite	Pyrite	Sphalerite	Fluorapatite	Brookite	Total Non-Clay	Muscovite-2M1	Illite-1M	Kaolinite-1A	Total Clay	Total
E150501-001	SC1-1125	0.084	0.003	0.23	0	0.013	0.007	0	0.649	0	0.986	0.015	0	0	0.015	1.001
E150501-002	SC2-3	0.845	0.06	0.02	0.001	0.021	0.003	0.001	0.003	0.008	0.962	0.015	0.023	0	0.038	1
E150501-003	SC2-16	0.796	0.065	0.003	0.001	0.014	0.006	0	0.001	0.009	0.895	0.024	0.082	0	0.106	1.001
E150501-004	SC2-16A	0.682	0.025	0.152	0	0.077	0.005	0.002	0.001	0.012	0.956	0.021	0.023	0	0.044	1
E150501-005	SC2-17	0.77	0.061	0	0	0.013	0.007	0	0	0.01	0.861	0.029	0.109	0	0.138	0.999
E150501-006	SC2-22A	0.6	0.071	0.027	0.008	0.019	0.012	0	0	0.017	0.754	0.061	0.186	0	0.247	1.001
E150501-007	SC2-23	0.63	0.069	0.025	0.004	0.029	0.006	0	0.001	0.014	0.778	0.051	0.172	0	0.223	1.001
E150501-008	SC2-25	0.53	0.032	0.083	0.005	0.211	0.003	0.003	0.007	0.027	0.901	0.019	0.081	0	0.1	1.001
E150501-009	SC2-26	0.634	0.057	0.027	0.009	0.02	0.008	0	0	0.015	0.77	0.053	0.177	0	0.23	1

## Sheet: Cape Lisburne xrd
Scan File Name	Field ID	Quartz	Albite	Anorthite	Calcite	Dolomite	Pyrite	Natrojarosite	Cristobalite	Muscovite-2M1	Illite	Kaolinite-1A	Clinochlore-1AIIb	Sum
E161110-001	16CL1-0.2	0.498	0.047	0.022	0.215	0.033	0.001	0	0	0.109	0.005	0.018	0.053	1.001
E161110-002	16CL1-0.5	0.547	0.076	0	0.172	0.021	0.001	0.005	0.001	0.138	0.01	0.006	0.023	1
E161110-004	16CL1-2.65	0.468	0.033	0	0.395	0.035	0	0	0	0.045	0.001	0	0.023	1
E161110-007	16CL1-4.6	0.454	0.108	0.011	0.169	0.017	0.002	0	0.001	0.179	0.014	0.01	0.034	0.999
E161110-009(D)	16CL1-5.4	0.294	0.138	0.042	0.454	0.04	0.001	0	0	0.024	0.001	0	0.005	0.999
E161110-009	16CL1-5.4	0.298	0.135	0.043	0.459	0.041	0	0	0	0.015	0.002	0	0.007	1
E161110-010	16CL3-8.5	0.424	0.187	0	0.13	0.002	0.004	0.017	0.003	0.135	0.023	0.029	0.046	1
E161110-013	16CL1-6.75	0.405	0.061	0	0.255	0.017	0.001	0.004	0	0.178	0.008	0.021	0.051	1.001
E161110-018	16CL1-9.8	0.631	0.098	0	0.009	0.009	0.002	0.005	0.001	0.173	0.014	0.02	0.038	1
E161110-020	16CL1-10.8	0.812	0.026	0.036	0.048	0.017	0.002	0.009	0	0.045	0.004	0	0	0.999
E161110-024	CL1-13.0-B	0.571	0.187	0.046	0.003	0.001	0.003	0.023	0	0.124	0.018	0.015	0.008	0.999
E161110-026	16CL1-13.05	0.816	0.062	0	0.023	0.011	0.002	0.001	0.001	0.045	0.007	0.002	0.031	1.001
E161110-026D	16CL1-13.05	0.816	0.085	0.003	0.022	0.011	0.002	0.003	0	0.048	0.005	0	0.005	1
E161110-029	16CL1-13.95	0.658	0.051	0	0.238	0.024	0.013	0	0.001	0.013	0.001	0.002	0	1.001
E161110-037	16CL1-16.5	0.526	0.083	0	0	0	0.001	0.091	0.001	0.259	0.03	0.007	0.002	1
E161110-040	16CL1-17.8	0.51	0.042	0	0.41	0.019	0.001	0	0	0.018	0	0	0	1
E161110-041	16CL1-18.4	0.535	0.018	0.014	0.398	0.016	0.001	0	0	0.017	0	0	0	0.999
E161110-047	16CL1-21.4	0.303	0.012	0	0.569	0.023	0.003	0	0	0.083	0.002	0	0.005	1
E161110-050	16CL1-27	0.339	0.143	0	0.017	0.006	0.001	0.027	0	0.31	0.038	0.037	0.082	1
E161110-051	16CL3-29.25	0.33	0.094	0	0	0	0.002	0.039	0.002	0.449	0.039	0.019	0.027	1.001
Scan File Name		Quartz	Albite | albite low	Calcite	Dolomite	Ankerite	Siderite	Jarosite	Pyrite	Baryte	Illite (NR)	Muscovite-2M1	Clinochlore 1M	Kaolinite-1A	Sum
E161111-001	16CL3-2.9	0.182	0.181	0.339	0	0	0	0	0	0.018	0.037	0.166	0.025	0.053	1.001
E161111-001D	16CL3-2.9	0.187	0.184	0.35	0	0	0	0	0	0.018	0.016	0.169	0.026	0.05	1
E161111-004	16CL3-8.5	0.558	0	0.352	0	0.046	0	0.005	0.001	0	0	0.032	0	0.005	0.999
E161111-005	16CL3-8.6	0.474	0.001	0.384	0	0.085	0	0.004	0.001	0	0	0.039	0	0.012	1
E161111-006	16CL3-9	0.552	0.021	0.363	0	0.005	0	0.006	0	0.002	0	0.043	0	0.008	1
E161111-008	16CL3-10	0.394	0	0.493	0	0.092	0	0.006	0	0	0	0.014	0	0	0.999
E161111-010	16CL3-12.5	0.332	0.126	0.012	0	0	0	0.005	0.003	0	0.284	0.213	0.012	0.014	1.001
E161111-011	16CL3-13.2	0.306	0.14	0.014	0	0.014	0.001	0.001	0.002	0	0.209	0.279	0.02	0.014	1
E161111-014	16CL3-16	0.76	0.066	0.013	0	0.006	0	0.002	0.005	0	0.048	0.095	0	0.003	0.998
E161111-015	16CL3-17.25	0.384	0.12	0.005	0	0.006	0	0.001	0.004	0	0.216	0.211	0.03	0.025	1.002
E161111-017	16CL3-18	0.181	0.014	0.545	0	0.09	0	0.008	0	0.001	0.025	0.135	0	0	0.999
E161111-024	16CL3-20.75	0.777	0.051	0.006	0	0.025	0	0.002	0.006	0	0.028	0.091	0.009	0.005	1
E161111-026	16CL3-21.68	0.814	0.047	0.002	0	0.023	0.005	0.002	0.001	0.001	0.027	0.066	0.006	0.005	0.999
E161111-028	16CL3-22.2	0.334	0.191	0.005	0	0	0	0.034	0.001	0	0.216	0.202	0.012	0.005	1
E161111-029(D)	16CL3-22.2	0.329	0.138	0.004	0.002	0	0	0.003	0	0	0.225	0.186	0.081	0.03	0.998
E161111-029	16CL3-29.56	0.306	0.123	0.002	0	0	0	0.002	0.001	0	0.214	0.237	0.072	0.043	1
E161111-030	16CL3-29.6	0.197	0.065	0.001	0.362	0.009	0.073	0	0.001	0	0.133	0.099	0.031	0.028	0.999
E161111-033	16CL3-30.2	0.538	0.052	0.001	0.155	0.099	0.035	0	0.004	0.001	0.029	0.061	0.01	0.017	1.002
E161111-035	16CL3-31.3	0.34	0.122	0.006	0.001	0	0	0.128	0	0	0.15	0.207	0.022	0.024	1
E161111-037	16CL3-31.65	0.655	0.032	0.001	0.16	0.064	0.039	0.001	0.004	0	0.015	0.015	0.001	0.013	1
E161111-038	16CL3-31.85	0.257	0.087	0.002	0.066	0.003	0.029	0.002	0.001	0	0.213	0.194	0.041	0.106	1.001

## Sheet: Tab S3 info
Table S3. XRD data
This Supplemental Material accompanies
Dumoulin, J.A., Whidden, K.J., Rouse, W.A., Lease, R.O., Boehlke, A., and O’Sullivan, P., 2022,
Biosiliceous, organic-rich, and phosphatic facies of Triassic strata of northwest Alaska: Transect across
a high-latitude, low-angle continental margin, in Aiello, I., Barron, J., and Ravelo, C., eds., Understanding
the Monterey Formation and Similar Biosiliceous Units across Space and Time: Geological Society of
America Special Paper 556, https://doi.org/10.1130/2022.2556(11).
